# Supplementary material for: CuO/NaNbO3 nanorod piezoelectric photocatalysts promoted tetracycline removal: a dynamic internal electric field
Source: Royal Society of Chemistry journal article supplement (doi:10.1039/d2cy02177c), 2023-01-01
Supplement: d2cy02177c1.pdf [file d2cy02177c1.pdf]

## Supporting Information

### **CuO/NaNbO<sub>3</sub> nanorod piezo-photocatalysts promoted tetracycline removal: a dynamic internal electric field**

Hongtao Wang <sup>a</sup>, Haiyue Zhang <sup>a</sup>, Ziyang Long <sup>a</sup>, Haifeng Shi <sup>\*ab</sup>

<sup>a</sup> School of Science, Jiangnan University, Wuxi, 214122, P. R. China

<sup>b</sup> National Laboratory of Solid State Microstructures, Nanjing University, Nanjing, 210093, P. R.

China

---

\*Corresponding author. E-mail: [hfshi@jiangnan.edu.cn](mailto:hfshi@jiangnan.edu.cn)

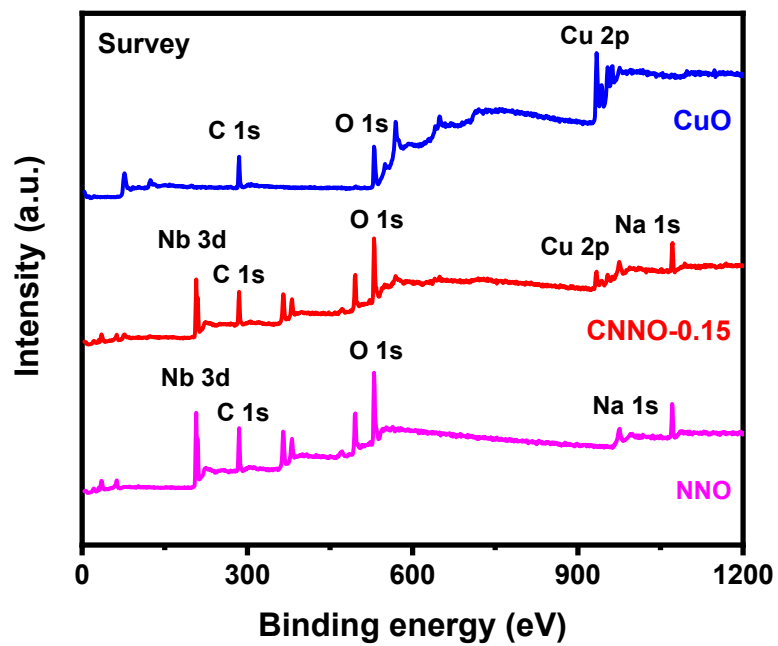

Figure S1. XPS spectra of CuO, NNO, and CNNO-0.15 (survey).

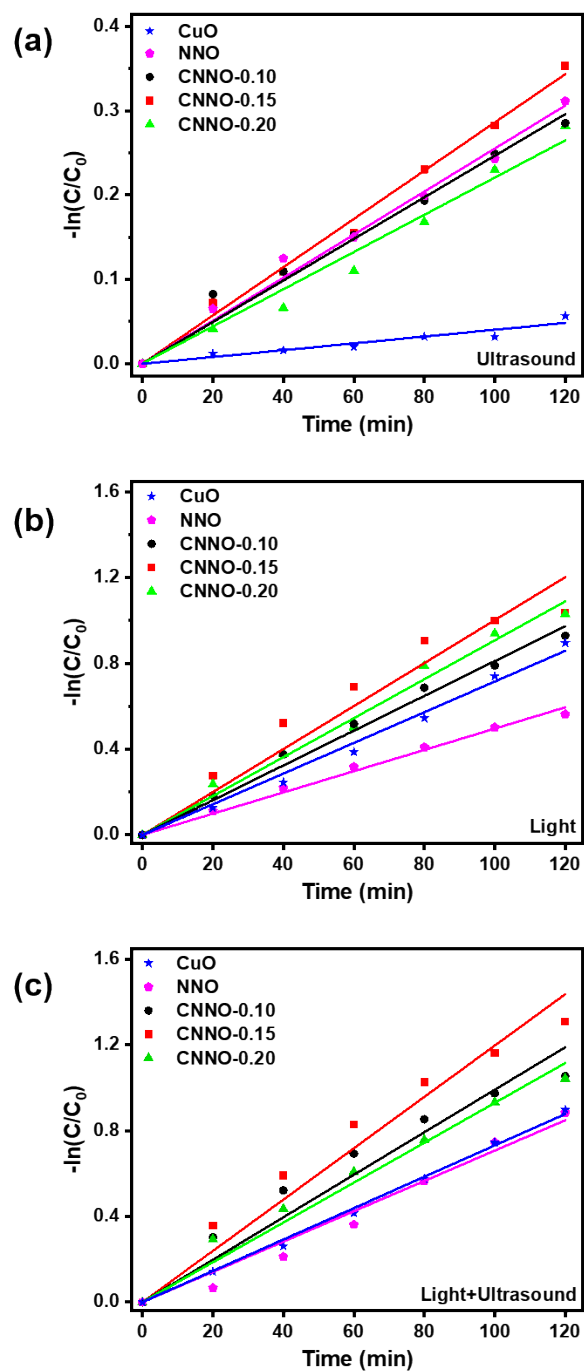

Figure S2. The curves of the TC degradation rate constants under different conditions:

(a) Ultrasound, (b) Light, and (c) Light + Ultrasound.

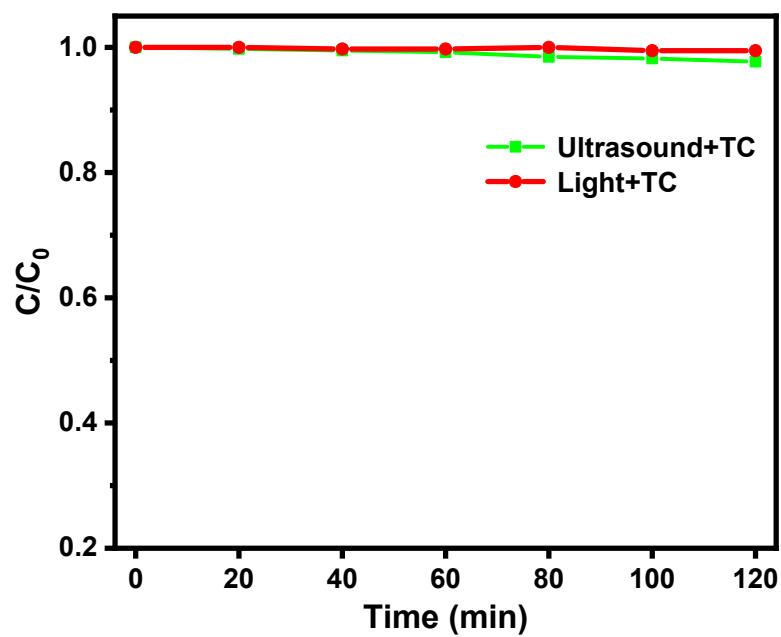

Figure S3. TC degradation curve without photocatalyst under ultrasound and dark (Green), and TC degradation curve without photocatalyst under light irradiation (Red).
